# Supplementary material
Source: Springer Nature journal article supplement (https://www.springermedizin.de/resource/supplementary/12885_2010_2820_MOESM2_ESM.pdf/9462016)

**Decorin**

**Normal Breast**

**Versican**

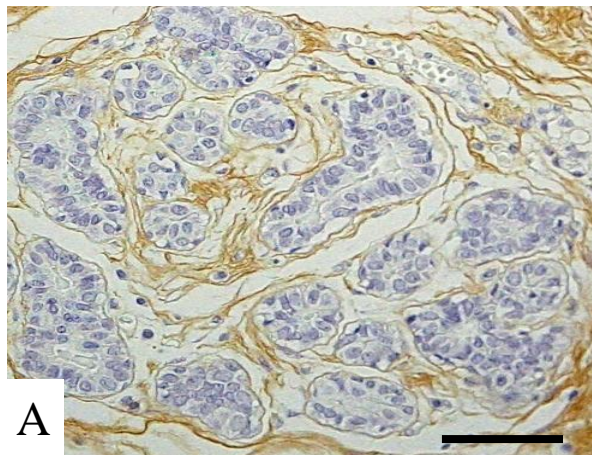

**A**

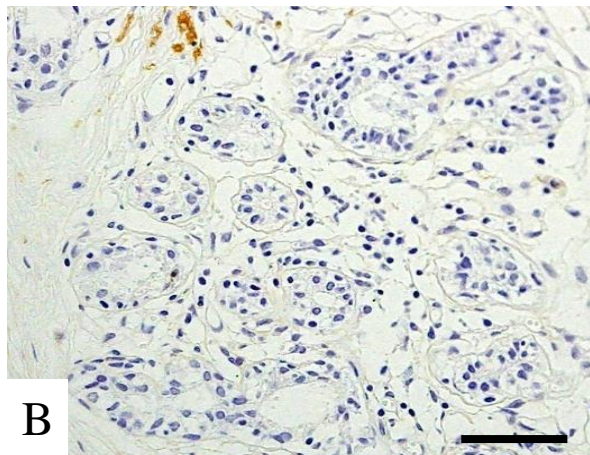

**B**

**Breast DCIS**

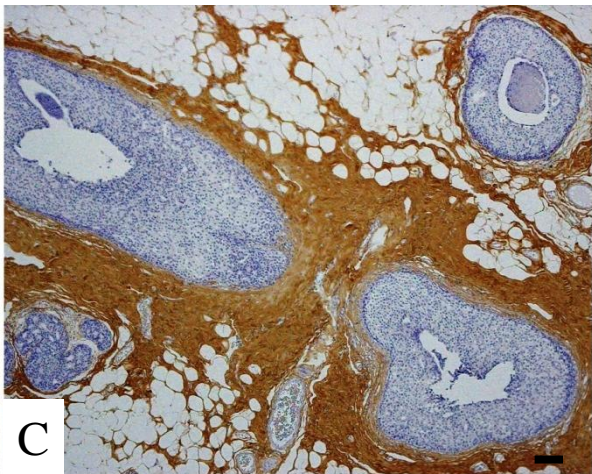

**C**

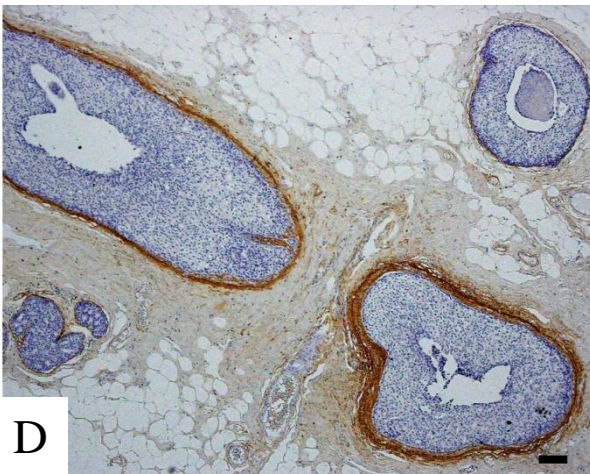

**D**

Supplement: MOESM2 [file 9462016]
